# Supplementary material for: Synthesis and Characterization of DOPO-Containing Poly(2,6-dimethyl-1,4-phenylene oxide)s by Oxidative Coupling Polymerization
Source: MDPI journal article supplement (doi:10.3390/polym16020303), 2024-01-22
Supplement: s1 [file s1]

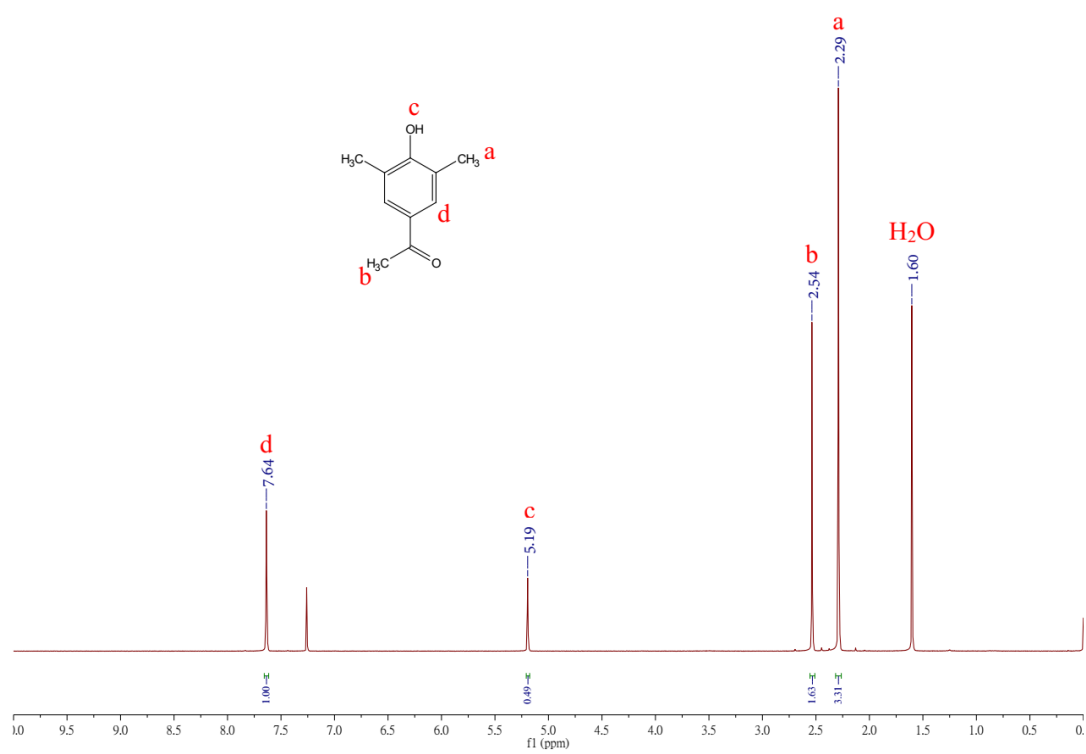

**Figure S1.** A representative  $^1\text{H}$  NMR spectra of DMP-Keto-R (R = Me) in  $\text{CDCl}_3$ .

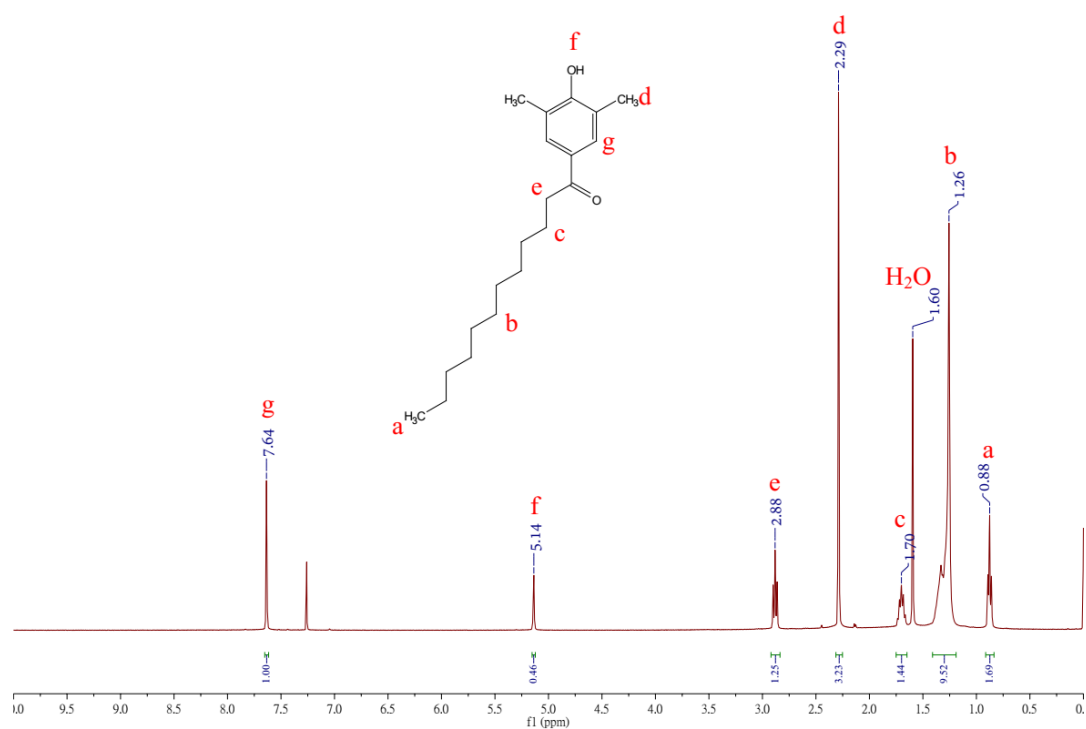

**Figure S2.** A representative  $^1\text{H}$  NMR spectra of DMP-Keto-R (R = C11) in  $\text{CDCl}_3$ .

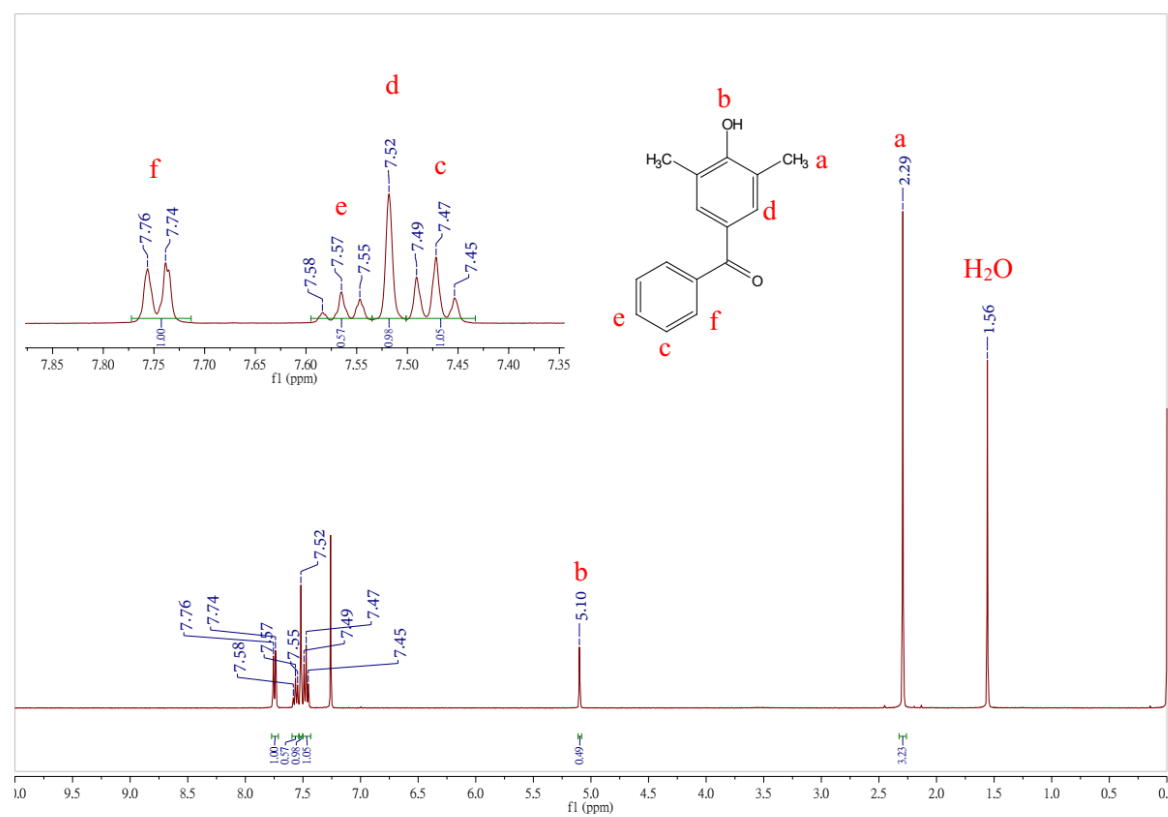

**Figure S3.** A representative  $^1\text{H}$  NMR spectra of DMP-Keto-R (R = Ph) in  $\text{CDCl}_3$ .

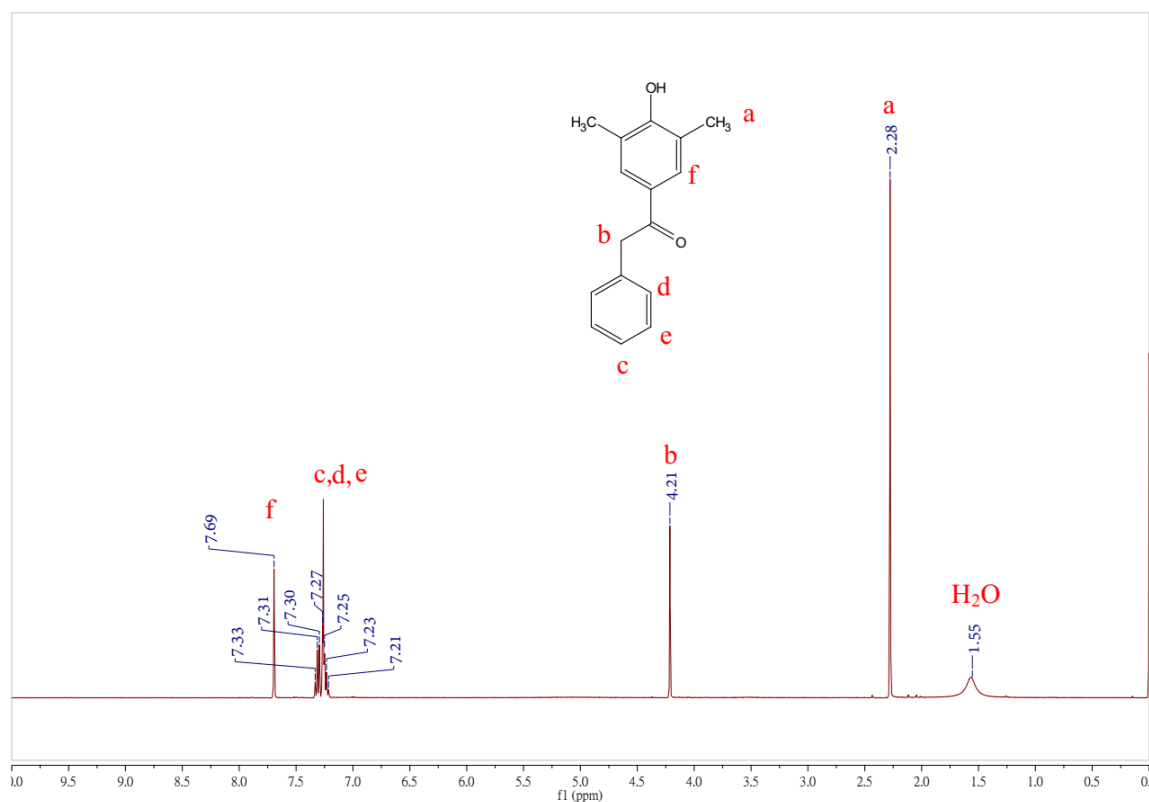

**Figure S4.** A representative  $^1\text{H}$  NMR spectra of DMP-Keto-R (R = Bz) in CDCl<sub>3</sub>.

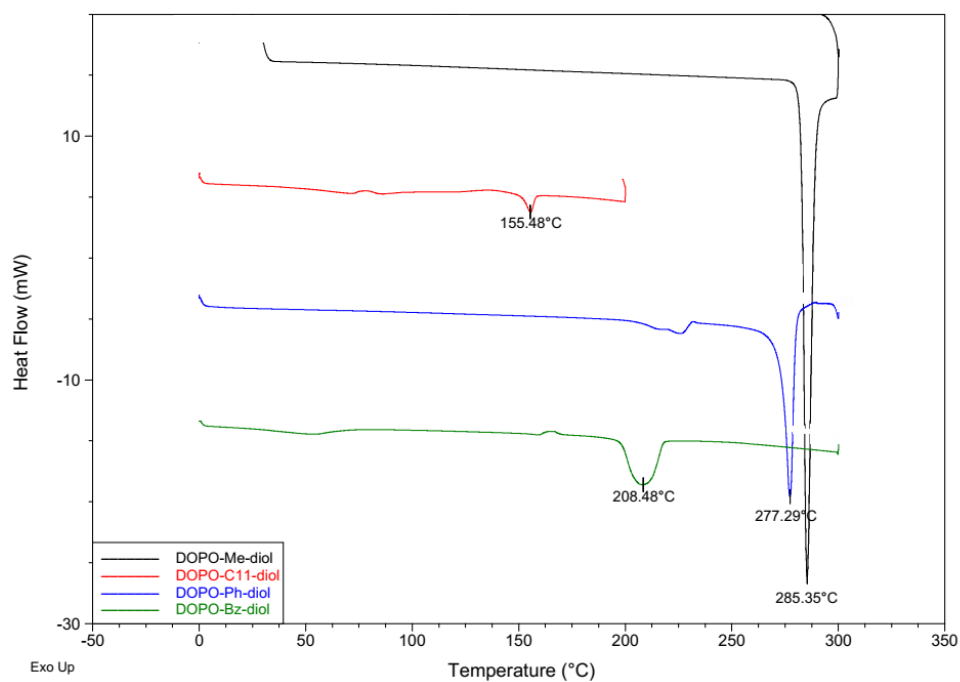

**Figure S5.** DSC heating curves of DOPO-R-diol.

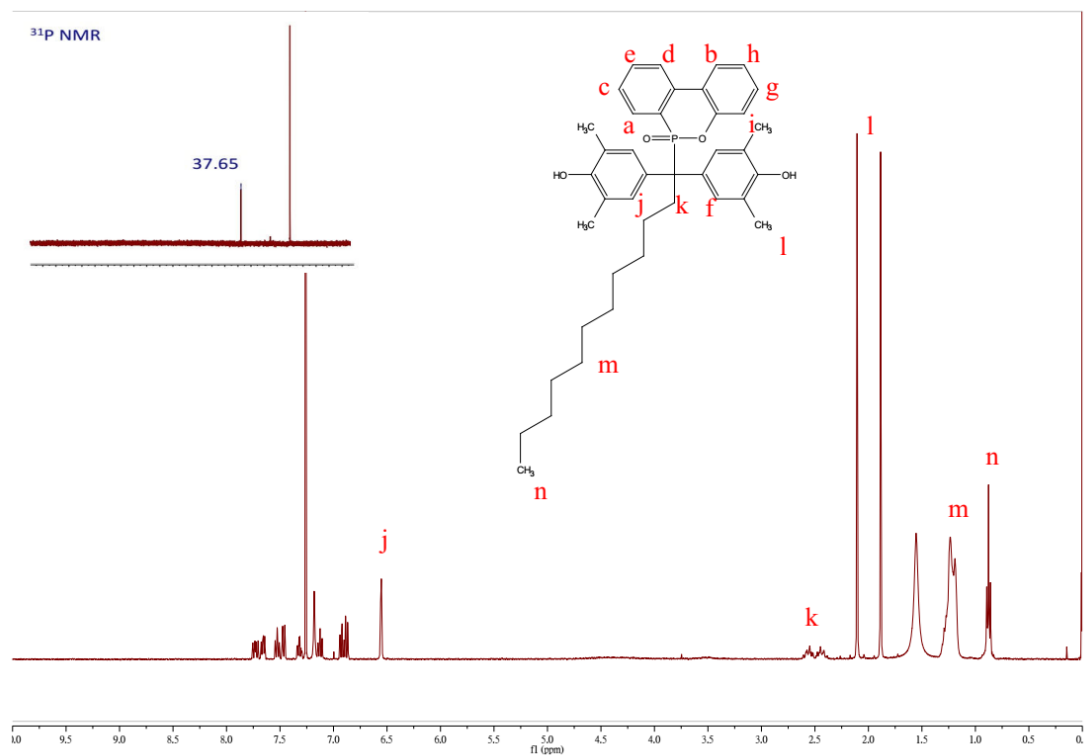

**Figure S6.** A representative <sup>1</sup>H NMR spectra of DOPO-R-diol (R = C11) in CDCl<sub>3</sub>.

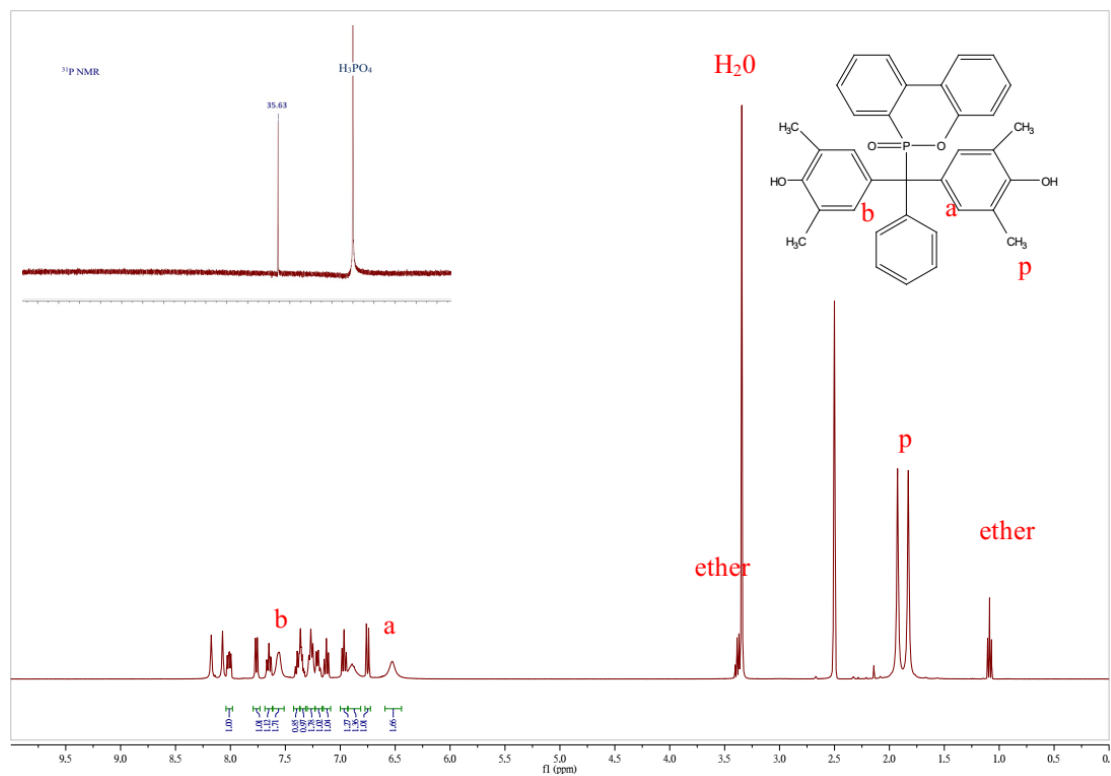

**Figure S7.** A representative <sup>1</sup>H NMR spectra of DOPO-R-diol (R = Ph) in DMSO-*d*<sub>6</sub>.

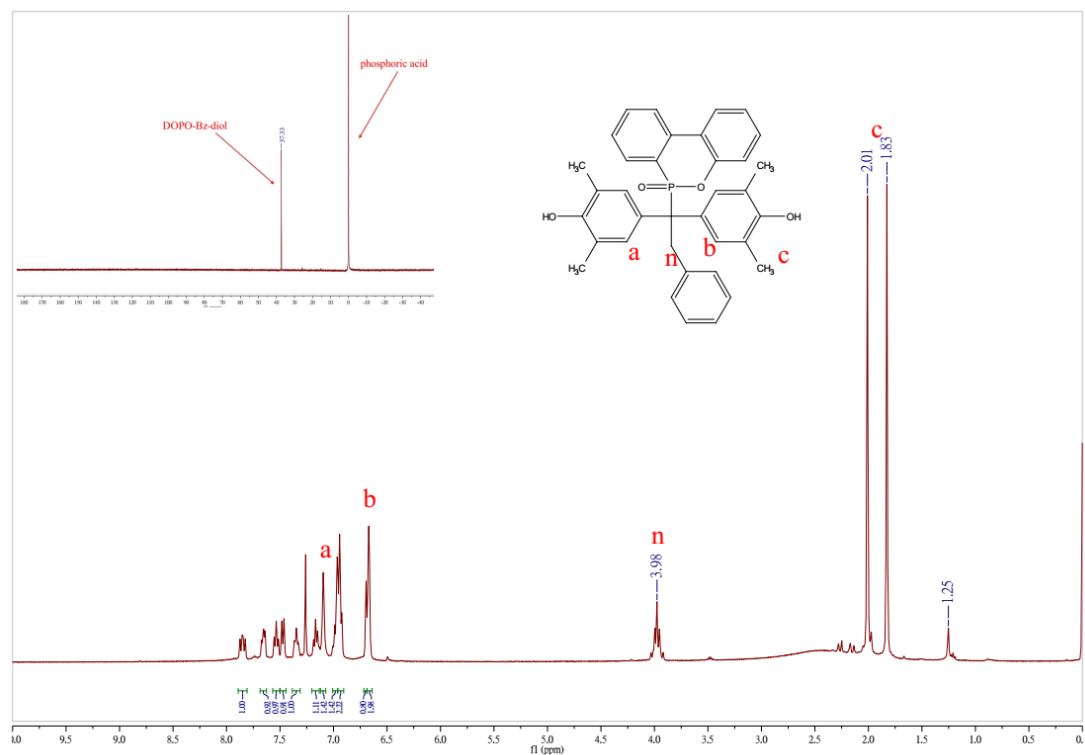

**Figure S8.** A representative  $^1\text{H}$  NMR spectra of DOPO-R-diol (R = Bz) in  $\text{CDCl}_3$ .

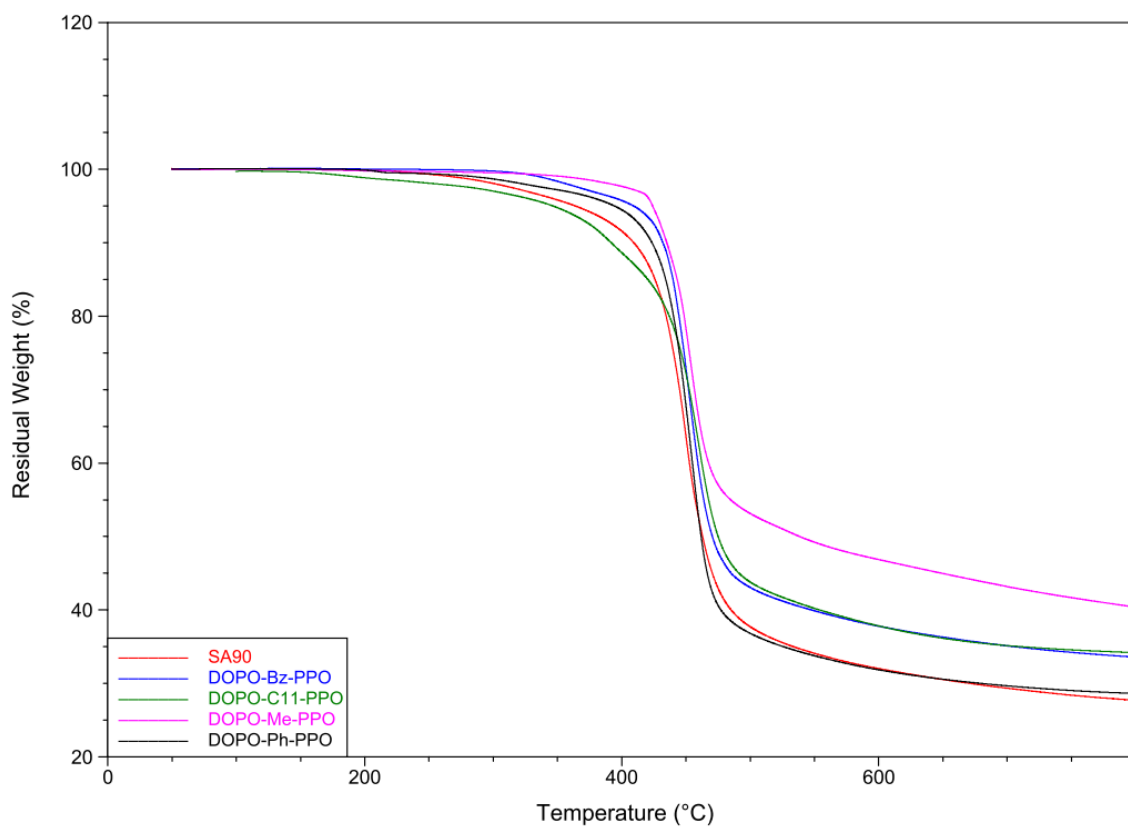

**Figure S9.** TGA thermograms of DOPO-R-PPOs in  $\text{N}_2$

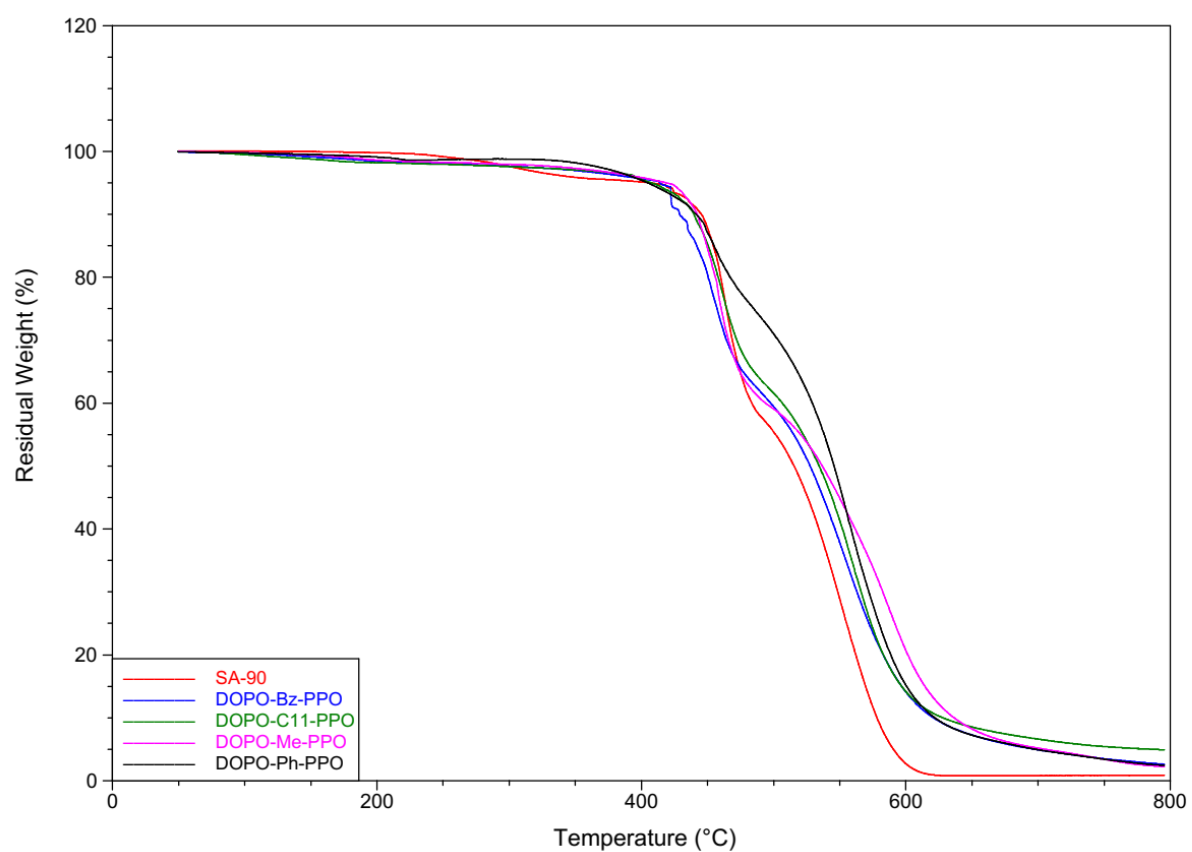

**Figure S10.** TGA thermograms of DOPO-R-PPOs in Air
